# Supplementary material for: The effects of emotions on online political participation: a systematic review
Source: Research Square preprint supplement (doi:10.21203/rs.3.rs-8520926/v1), 2026-02-02
Supplement: Supplementary file 1 [file 87800371f920aa60e1c4409a.docx]

**Online Supplementary Information (SI)**

**The effects of emotions on online political participation: A Systematic Review**

*Anonymized for peer review*

**Contents**

[1 Search and coding protocol 4](#_Toc215931777)

[1.1 Inclusion/exclusion criteria 4](#_Toc215931778)

[1.2 Search terms and databases 5](#_Toc215931779)

[1.2.1 Web of Science Core Collection 5](#_Toc215931780)

[1.2.2 Scopus 6](#_Toc215931781)

[1.2.3 IEEE Xplore Digital Library 6](#_Toc215931782)

[1.2.4 ProQuest™ Dissertations & Theses Citation Index 7](#_Toc215931783)

[1.3 Coding 7](#_Toc215931784)

[1.3.1 General Information on Coding 7](#_Toc215931785)

[1.3.2 Report Characteristics 8](#_Toc215931786)

[1.3.3 Study Characteristics 10](#_Toc215931787)

[1.3.4 Emotion Variables 12](#_Toc215931788)

[1.3.5 Online Political Participation Variables 15](#_Toc215931789)

[1.3.6 Outcomes and Effects 19](#_Toc215931790)

[1.3.7 Quality Assessment 20](#_Toc215931791)

[1.3.8 Mixed Methods Appraisal Tool (MMAT) Version 2018 21](#_Toc215931792)

[1.4 List of included studies 24](#_Toc215931793)

[1.5 Inter-rater agreement 31](#_Toc215931794)

[2 Sensitivity Analysis: Methods and Detailed Results 33](#_Toc215931795)

[2.1 Methodological Foundation 33](#_Toc215931796)

[2.2 Sensitivity Criteria and Quality Threshold 33](#_Toc215931797)

[2.3 Methodological Quality of Included Studies 34](#_Toc215931798)

[2.4 Sensitivity Analysis by Dimension 35](#_Toc215931799)

[3 PRISMA 2020 abstract checklist 39](#_Toc215931800)

[4 PRISMA 2020 main checklist 41](#_Toc215931801)

[5 Synthesis Without Meta-analysis (SWiM) reporting items 47](#_Toc215931802)

[6 References 49](#_Toc215931803)

**List of Tables**

[**Table A1** Inclusion and exclusion criteria 4](#_Toc214522260)

[**Table A2** Search strategy in the Web of Science database 5](#_Toc214522261)

[**Table A3** Search strategy in the Scopus database 6](#_Toc214522262)

[**Table A4** Search strategy in the IEEE Xplore Digital Library database 6](#_Toc214522263)

[**Table A5** Search strategy in the ProQuest Dissertations & Theses Citation Index database 7](#_Toc214522264)

[**Table A6** Reliability Summary Across All Phases 32](#_Toc214522265)

[**Table A7** Kappa (κ) for Key Variables (Outcomes) 32](#_Toc214522266)

[**Table A8** Methodological quality distribution (MMAT) 34](#_Toc214522267)

[**Table A9** Methodological Quality by Study Design 35](#_Toc214522268)

[**Table A10** Scientific Transparency Practices 35](#_Toc214522269)

[**Table A11** Sensitivity to Methodological Quality 36](#_Toc214522270)

[**Table A12** Variation by Digital Platform 36](#_Toc214522271)

[**Table A13** Cultural Variation (WEIRD vs Non-WEIRD) 36](#_Toc214522272)

[**Table A14** Contextual specialization (elections vs political communication) 37](#_Toc214522273)

[**Table A15** Specialization by type of online political participation 37](#_Toc214522274)

[**Table A16** PRISMA Abstract Checklist 39](#_Toc214522275)

[**Table A17** PRISMA main checklist 41](#_Toc214522276)

[**Table A18** Synthesis Without Meta-Analysis (SWiM) Reporting Items 47](#_Toc214522277)

# Search and coding protocol

This section describes the systematic procedures used to identify, select, and code the studies included in this review. Following the PRISMA guidelines, we employed a rigorous and transparent approach across all stages of the review process.

The protocol includes the definition of inclusion and exclusion criteria (Section 1.1), development and execution of search strategies across multiple databases (Section 1.2), systematic coding of study characteristics and variables (Section 1.3), and assessment of inter-rater reliability (Section 1.5). Each subsection provides detailed documentation to ensure the transparency and reproducibility of our methods.

## **Inclusion/exclusion criteria**

The inclusion and exclusion criteria were designed to identify original empirical studies using primary data that examined online political participation and emotions as associated variables (Table A1).

**Table A1**
Inclusion and exclusion criteria

| **Exclusion Criteria** | **Inclusion Criteria** |
| --- | --- |
| Evidence synthesis (meta-analyses, reviews)  Conceptual and theoretical studies  Studies published in languages other than English  Abstracts or extended abstracts  Empirical studies that do not explore the existence of a relationship between variables  Purely methodological articles (e.g., emotion detection)  All inclusion criteria were not met | Emotions as a variable  Use of digital media  Online political participation as a variable  Original empirical work |

*Note.* All inclusion criteria must be met simultaneously (connector “and ”). The presence of any single exclusion criterion was sufficient to exclude a study from the review sample ("or" connector).

Screening was conducted in two stages: title and abstract screening, followed by full-text assessment when eligibility could not be determined from the abstract alone. At the abstract stage, records that clearly failed to meet one or more inclusion criteria or met any exclusion criteria were removed. When eligibility could not be determined from the abstract, the study was advanced to full-text assessment.

During full-text screening, potentially relevant articles were evaluated against all inclusion and exclusion criteria. When articles were not accessible through institutional subscriptions, open-access repositories, or interlibrary loan services, we contacted the authors via academic platforms (e.g., ResearchGate, personal websites) to request the full text before excluding the study for inaccessibility. Studies were excluded only when ineligibility or inaccessibility was confirmed.

## Search terms and databases

The database search strategy was developed in consultation with a research librarian at the State University of Londrina, Brazil, and was executed across the following databases: Web of Science Core Collection, Scopus, IEEE Xplore Digital Library, and ProQuest™ Dissertations and Theses Citation Index.

Search strategies were developed and adapted for each database by adjusting synonyms, Boolean operators, truncation symbols, and wildcards as needed. Searches were conducted across titles, abstracts, author keywords and database-indexed keywords. The complete search strategies for all the databases are presented below.

### Web of Science Core Collection

**Table A2**Search strategy in the Web of Science database

| **Interface:** | Clarivate (Web of Science) |
| --- | --- |
| **Field labels:** | TS = Topic (title, abstract, author keywords, Keywords Plus) . ***** = truncation |
| **Date:** | May 9, 2024 |
| **Results:** | 2,256 |
| **Limits:** | Language = English; Timespan = – May 9, 2024 |
| **Note:** | use quotation marks for exact phrases |
| **Search strings:**  TS=((emotio* OR emotivism OR sentiment OR Affective OR feeling OR mood OR “political psychology” OR sadness OR fear OR anger OR joy OR surprise OR guilt OR anxiety OR passion* OR hope OR boredom OR demoralization OR euphoria OR frustration OR pleasure) AND ((“Messaging Apps” OR WeChat OR WhatsApp OR Facebook OR Twitter OR Weibo OR Youtube OR Instagram OR TikTok OR “social media” OR “social networking sites” OR blogs OR “media use” OR “digital media” OR “Media, Digital”) AND (activis* OR protest OR “online political participation” OR “online participation” OR mobilization OR “political communication” OR participation OR “political engagement” OR “digital activism” OR “cyberactivism” OR clicktivism OR “cyber-activism” OR “online activism” OR “social media activism” OR “internet activism” OR “informational activism” OR “web activism” OR “e-activism” OR “hashtag activism” OR “net activism” OR “mobile activism” OR “online petition” OR “Online Mobilization” OR “political participation online” OR “digital political mobilization” OR “political participation”))) | |

### Scopus

**Table A3**
Search strategy in the Scopus database

| **Interface:** | Elsevier (Scopus) |
| --- | --- |
| **Field labels:** | TITLE-ABS-KEY(…) . ***** = truncation |
| **Date:** | May 9, 2024 |
| **Results:** | 3,058 |
| **Limits:** | Language = English; Timespan = – May 9, 2024 |
| **Note:** | use quotation marks for exact phrases |
| **Search strings:**  TITLE-ABS-KEY ( ( emotio* OR emotivism OR sentiment OR affective OR feeling OR mood OR "political psychology" OR sadness OR fear OR anger OR joy OR surprise OR guilt OR anxiety OR passion* OR hope OR boredom OR demoralization OR euphoria OR frustration OR pleasure ) AND ( ( "Messaging Apps" OR wechat OR whatsapp OR facebook OR twitter OR weibo OR youtube OR instagram OR tiktok OR "social media" OR "social networking sites" OR blogs OR "media use" OR "digital media" OR "Media, Digital" ) AND ( activis* OR protest OR "online political participation" OR "online participation" OR mobilization OR "political communication" OR participation OR "political engagement" OR "digital activist" OR "cyberactivism" OR clicktivism OR "cyber-activist" OR "online activism" OR "social media activism" OR "internet activism" OR "informational activism" OR "web activism" OR "e-activism" OR "hashtag activism" OR "net activism" OR "mobile activism" OR "online petition" OR "Online Mobilization" OR "political participation online" OR "digital political mobilization" OR "political participation" ) ) ) | |

### IEEE Xplore Digital Library

**Table A4**
Search strategy in the IEEE Xplore Digital Library database

| **Interface:** | IEEE Xplore |
| --- | --- |
| **Field labels:** | All Metadata (title, abstract, author keywords, etc.) . ***** = truncation |
| **Date:** | May 9, 2024 |
| **Results:** | 419 |
| **Limits:** | Language = English; Timespan = – May 9, 2024 |
| **Note:** |  |
| **Search strings:**  ("All Metadata":emotio* OR "All Metadata":emotivism OR "All Metadata":sentiment OR "All Metadata":Affective OR "All Metadata":feeling OR "All Metadata":mood OR "All Metadata":“political psychology” OR "All Metadata":sadness OR "All Metadata":fear OR "All Metadata":anger OR "All Metadata":joy OR "All Metadata":surprise OR "All Metadata":guilt OR "All Metadata":anxiety OR "All Metadata":passion* OR "All Metadata":hope OR "All Metadata":boredom OR "All Metadata":demoralization OR "All Metadata":euphoria) AND ("All Metadata":“Messaging Apps” OR "All Metadata":WeChat OR "All Metadata":WhatsApp OR "All Metadata":Facebook OR "All Metadata":Twitter OR "All Metadata":Weibo OR "All Metadata":Youtube OR "All Metadata":Instagram OR "All Metadata":TikTok OR "All Metadata":“social media” OR "All Metadata":“social networking sites” OR "All Metadata":blogs OR "All Metadata":“media use” OR "All Metadata":“digital media” OR "All Metadata":“Media, Digital”) AND ("All Metadata":activis* OR "All Metadata":protest OR "All Metadata":"online participation" OR "All Metadata":mobilization OR "All Metadata":"political communication" OR "All Metadata":participation OR "All Metadata":"political engagement" OR "All Metadata":"digital activism" OR "All Metadata":"cyberactivism" OR "All Metadata":clicktivism OR "All Metadata":"cyber-activism" OR "All Metadata":"online activism" OR "All Metadata":"social media activism" OR "All Metadata":"internet activism" OR "All Metadata":"informational activism" OR "All Metadata":"web activism" OR "All Metadata":"e-activism" OR "All Metadata":"hashtag activism" OR "All Metadata":"online petition" OR "All Metadata":"digital political mobilization") | |

### ProQuest™ Dissertations & Theses Citation Index

**Table A5**
Search strategy in the ProQuest Dissertations & Theses Citation Index database

| **Interface:** | Web of Science (ProQuest Dissertations & Theses Citation Index) |
| --- | --- |
| **Field labels:** | TS = Topic ***** = truncation |
| **Date:** | May 9, 2024 |
| **Results:** | 505 |
| **Limits:** | Language = English; Timespan = – May 9, 2024 |
| **Note:** | use quotation marks for exact phrases |
| **Search strings:**  TS=((emotio* OR emotivism OR sentiment OR Affective OR feeling OR mood OR “political psychology” OR sadness OR fear OR anger OR joy OR surprise OR guilt OR anxiety OR passion* OR hope OR boredom OR demoralization OR euphoria OR frustration OR pleasure) AND ((“Messaging Apps” OR WeChat OR WhatsApp OR Facebook OR Twitter OR Weibo OR Youtube OR Instagram OR TikTok OR “social media” OR “social networking sites” OR blogs OR “media use” OR “digital media” OR “Media, Digital”) AND (activis* OR protest OR “online political participation” OR “online participation” OR mobilization OR “political communication” OR participation OR “political engagement” OR “digital activism” OR “cyberactivism” OR clicktivism OR “cyber-activism” OR “online activism” OR “social media activism” OR “internet activism” OR “informational activism” OR “web activism” OR “e-activism” OR “hashtag activism” OR “net activism” OR “mobile activism” OR “online petition” OR “Online Mobilization” OR “political participation online” OR “digital political mobilization” OR “political participation”))) | |

## Coding

### General Information on Coding

This review uses the emotion–participation relationship as the unit of analysis, reflecting the multidimensional nature of the influence of emotions on online political participation. Each relationship is defined by five dimensions: (1) the specific emotion examined (e.g., anger, enthusiasm), (2) the form of political participation (e.g., sharing, commenting), (3) the national context, (4) the digital platform, and (5) the direction of effect (positive, negative, or null). Each unique combination of these dimensions constituted an independent observation in the synthesis.

A single study may contribute to multiple relationships in the analysis. For instance, a study examining how anger and fear affect both content sharing and political discussion on Twitter would generate four distinct relationships (2 emotions × 2 participation forms × 1 platform). Cross-national studies generate separate relationships for each country because the cultural context may moderate emotional effects. This granular approach ensures that the synthesis captures the full complexity of emotion–participation dynamics while maintaining analytical precision.

To enable a systematic comparison across studies, standardized coding categories were developed through a two-stage inductive process. First, coders extracted emotion and participation measures verbatim from each study, preserving the authors' original terminology in "rich" variables (emo_measure_rich, opp_measure_rich, opp_pt_rich). Second, these measures were iteratively consolidated into standardized "clean" categories (emo_measure_clean, opp_measure_clean, opp_pt_clean) by grouping conceptually equivalent terms. For example, diverse labels such as "retweet behavior," "online sharing behavior," and "content dissemination on Twitter" were unified under the category "Share," as they all refer to the redistribution of political content through social networks. This process balanced fidelity to the original studies with the need for cross-study comparability in the data.

### Report Characteristics

**refid** – Reference ID

**Objective.** Unique identifier assigned to each report in the review process.

**How to code.** Automatic assignment through the reference management system.

**Response format.** Automatic.

**author** – Author

**Objective.** Register complete authorship of the publication.

**How to code.** Enter full name(s) as they appear in the publication.

**Response format.** Free text.

**year_publication** – Year

**Objective.** Publication year of the report.

**How to code.** Use the year of the most recent version when multiple versions exist.

**Response format.** Numeric (YYYY).

**report_type** – Report Type

**Objective.** Classify the type of publication.

**How to code.** Select the category that best describes the publication. When multiple formats exist, prioritize the one with higher review rigor.

**Response format.** Categorical (single choice).

**Options.** Journal article; Book; Book chapter; PhD dissertation; MA thesis; Conference paper.

**report_title** – Title

**Objective.** Register complete title as published.

**How to code.** Copy the title exactly as it appears in the publication, preserving capitalization and punctuation from the source.

**Response format.** Automatic.

**publication_title** – Publication Title

**Objective.** Identify publication venue/source.

**How to code.** Enter full name of journal, publisher, or conference in its official format.

**Response format.** Automatic.

**report_doi** – DOI

**Objective.** Register digital identifier when available.

**How to code.** Copy complete DOI including prefix (e.g., 10.1080/10584609.2019.1661891).

**Response format.** Automatic (if imported) or Free text (if manually added).

**abstract_note** – Abstract Note

**Objective.** Preserve original abstract from publication.

**How to code.** Extract complete abstract/summary text as presented.

**Response format.** Automatic (if imported) or Free text (if manually added).

**peerreviewed** – Peer-reviewed

**Objective.** Determine peer review status.

**How to code.** Select *Peer reviewed* for journal articles with review process; *Not peer reviewed* for working papers, dissertations, reports; *Can't tell* when information is unclear.

**Response format.** Categorical (single choice).

**Options.** *Peer reviewed; Not peer reviewed; Can't tell.*

**funding** – Funding Information

**Objective.** Identify presence of funding.

**How to code.** Select Yes if explicit mention of funding, grants, or sponsorship; *No* otherwise.

**Response format.** Binary (Yes/No).

**Options.** Yes; No*.*

**funder_name** – Funder Name

**Objective.** Specify funding source when applicable.

**How to code.** List complete name(s) of funding institution(s) as reported.

**Response format.** Free text.

**Dependency.** Fill only if funding = Yes.

### Study Characteristics

**type_methods** – Methodological Classification

**Objective.** Classify the methodological nature of the study.

**How to code.** Select the category that best describes the study’s approach.

**Response format.** Categorical (single choice).

**Options.** Qualitative; Quantitative; Mixed methods.

**statistical_tech** – Statistical Techniques

**Objective. Identify statistical techniques used.**

**How to code.** Indicate “No” if no techniques are used; if “Yes”, list techniques (e.g., OLS, Logit, Poisson, MLM, SEM, DiD, IV, Propensity Score, Bayes).

**Response format.** Free text.

**Note.** Use established abbreviations and, when possible, reference the article’s methodology section.

**study_design** – Study Design and Method

**Objective.** Register the primary study design.

**How to code.** Choose the predominant category reported by the authors.

**Response format.** Categorical (single choice).

**Options.** Content analysis (computer-assisted); Content analysis; Experiment; Survey; Panel survey; Quasi-experiment.

**study_type** – Study Type

**Objective.** Capture study type in terms of temporality and randomization.

**How to code.** Select the option that best corresponds to the design.

**Response format.** Categorical (single choice).

**Options.** Cross-sectional; Randomized trial; Longitudinal; Panel.

**automated_analysis** – Automated Analysis

**Objective.** Indicate whether automated analysis was employed (e.g., NLP, computer vision).

**How to code.** Select Yes or No.

**Response format.** Binary (Yes/No).

**Options.** Yes; No.

**automated_analysis_used** – Automated Analysis Used

**Objective.** Specify the type of automation when applicable.

**How to code.** Describe the technique (e.g., lexicons, transformers, topic modeling, sentiment/emotion classifiers, image recognition).

**Response format.** Free text.

**Dependency.** Fill only if automated_analysis = Yes.

**sampling** – Sampling

**Objective.** Characterize the sampling method.

**How to code.** Select one category using the decision rules below. The categories are mutually exclusive. When applicable, specify the subtype in the comment (e.g., for “Probabilistic sampling,” note: “stratified”).

**Response format.** Categorical (single choice) + optional comment.

**Options.** Random sampling; Probabilistic sampling (non-SRS); Non-probabilistic sampling; Census.

**Decision Rules (Mutually Exclusive Categories)**

1. **Random sampling (SRS).** Selection where every unit in a defined sampling frame has an equal and known probability of selection. This is a specific, ideal type of probabilistic sampling.

**Terms.** “simple random sample”, “random draw”, “uniform random selection”.

**Example.** “*A simple random sample of 1,000 users was drawn from the complete national voter registry*.”

1. **Probabilistic sampling (non-SRS).** Selection with known, non-zero, but not equal probabilities. The design imposes unequal inclusion via stratification, clustering, multistage selection, systematic (with random start), or PPS. RDD qualifies only when selection probabilities are documented.

**Types.** Stratified; cluster; multistage; systematic (random start); PPS; RDD (with documented inclusion probabilities).

**Example.** “*We used a stratified random sample, drawing participants from each state proportional to its population.*”

1. **Non-probabilistic sampling.** Selection without a known probability mechanism; inclusion probabilities cannot be calculated. Also use this when authors say “random” but no frame/mechanism ensures known probabilities (de facto pseudo-random). RDD with demographic quotas that break probability belongs here. Platform/API ‘random’ samples without documented inclusion probabilities also belong here.

**Types.** Convenience; quota; purposive; snowball; volunteer opt-in; pseudo-random draws without a frame; RDD with quota constraints that remove known inclusion probabilities; platform/API stream “samples” without documented selection.

**Examples.** “*We collected a convenience sample of users who clicked a promoted link on Twitter/X*.” “*We ‘randomly’ selected 500 tweets from search results (no frame)*.”

1. **Census.** The dataset includes the entire population (universe) of interest, as defined ex ante for the analysis.

**Example.** “*Our analysis includes all public posts made by the two main presidential candidates’ official accounts in the 3 months before the election*.”

**sample_size** – Sample Size

**Objective.** Register the size of the analyzed sample.

**How to code.** Enter the reported integer number (n).

**Response format.** Numeric (integer).

**Note.** If the study reports multiple samples, register the one referring to the association in focus.

**sample_type** – Sample Type

**Objective.** Indicate the type of sampling unit.

**How to code.** Select the category that describes the analyzed material.

**Response format.** Categorical (single choice).

**Options.** Images; Messages; News Articles; Participants; Petitions; Posts; Threads; Tweets; Videos.

**number_association** – Number of Associations

**Objective.** Report how many analytical associations the report contains.

**How to code.** Enter the total number of associations extracted from the study.

**Response format.** Numeric (integer ≥ 1).

**id_association** – Association ID

**Objective.** Unique identifier for the association.

**How to code.** Automatic assignment according to spreadsheet/extraction routine.

**Response format.** Automatic.

**country** – Country

**Objective.** Country where the sample was recruited/collected.

**How to code.** Use a standardized country list. For multiple countries, create one association per country.

**Response format.** Categorical (country list).

### Emotion Variables

**emo_measure_rich** – Emotion Measure

**Objective.** Register the original name of the emotional variable as described.

**How to code.** Extract the exact terminology used by the authors, preserving original phrasing and conceptual variations.

**Response format.** Free text.

**emo_measure_clean** – Emotion Measure Clean

**Objective.** Classify emotion-related measures into standardized categories based on the emotional construct explicitly measured.

**How to code.** Assign one category per measure, following the priority rules: Primary Emotion Priority → Valence Rule → Generic Classification. Map from emo_measure_rich to emo_measure_clean inductively using these rules.

**Response format.** Categorical (single choice).

**Options.** Anger; Anxiety; General Emotionality; Enthusiasm; Fear; Happiness; Hope; Negative emotion; Nostalgia; Other; Positive emotion; Pride; Resentment; Sadness.

**Coding Principles**

**Primary Emotion Priority.** When studies explicitly name discrete emotions (anger, fear, hope), use the specific emotion category regardless of measurement method (scales, LIWC, emoji, ML).

**Valence Rule.** Measures focusing on positive/negative emotional valence without specific emotions are classified as Positive emotion or Negative emotion.

**Generic Classification.** General emotional measures (“emotionality,” “emotional content,” “sentiment”) are coded as General Emotionality only if they are explicitly neutral or mixed. If the description, context, or common academic use implies a clear positive or negative polarity (even without discrete emotions), code Positive emotion or Negative emotion.

**Decision rule.** Ask: “Does the term most commonly denote a positive or a negative state?” If yes, use the valence code. If it is truly neutral (e.g., “emotional arousal”) or explicitly mixed (e.g., “emotional content”), use General Emotionality.

**Examples.** “Positive sentiment” → Positive emotion; “Negative affect” → Negative emotion; “Sentiment” → General Emotionality; “Emotionality” → General Emotionality; “Emotional arousal” → General Emotionality.

**Emoji Mapping.** Emoji-based measures map to corresponding emotional meanings (e.g., angry emoji → Anger, sad emoji → Sadness, heart emoji → Positive emotion).

**Mapping basis.** emo_measure_clean is derived inductively from emo_measure_rich by grouping synonymous or closely related labels into standardized categories.

**Disambiguation Rules**

**Happiness vs Positive emotion.** Use Happiness only when joy/happiness/contentment is explicitly named; use Positive emotion for general positive valence or mixed positive affects.

**Anxiety vs Fear.** Use Fear for threat perception of immediate/concrete dangers; use Anxiety for worry about abstract/future uncertainties.

**Anger vs Resentment.** Use Anger for immediate rage/indignation; use Resentment only for group-based bitterness or sustained grievance.

**Categories**

**Anger.** Rage, indignation, outrage, and anger-related constructs.

**Anxiety.** Worry, nervousness, tension, and anxiety-related states.

**Fear.** Threat perception, danger, fright, and fear-related constructs.

**Sadness.** Sadness, sorrow, dejection, and related negative affects.

**Resentment.** Resentment and bitterness, particularly group-based resentment.

**Enthusiasm.** Excitement, energetic positive engagement, and enthusiasm-related constructs.

**Happiness.** Joy, happiness, contentment, and happiness-related constructs.

**Hope.** Optimism, positive future expectations, and hope-related constructs.

**Pride.** Pride in groups, achievements, or political entities.

**Nostalgia.** Longing for idealized past states.

**Positive emotion.** Positive emotional valence or affect without specific discrete emotion focus.

**Negative emotion.** Negative emotional valence or affect without specific discrete emotion focus.

**General Emotionality.** General emotionality, mixed emotional content, or emotional intensity measures.

**Other.** Unusual emotional constructs that do not fit standard categories.

**emo_explicit_oper** – Explicit Operationalization

**Objective.** Determine whether the study provides explicit operationalization of the emotional variable.

**How to code.** Select *Yes* if a clear definition, measurement procedure, or theoretical framework is provided; *No* if operationalization is absent or unclear.

**Response format.** Binary (Yes/No).

**Options.** Yes; No.

**emo_valence** – Valence

**Objective.** Identify whether the study uses emotional valence to categorize emotions.

**How to code.** Select *Yes* if the study explicitly uses positive/negative valence dimensions; *No* if valence is not considered or mentioned.

**Response format.** Binary (Yes/No).

**Options.** Yes; No.

**emo_discrete** – Discrete

**Objective.** Determine whether emotions are represented as discrete emotions in the study.

**How to code.** Select *Yes* if the study focuses on specific, distinct emotional states (e.g., anger, joy, fear); *No* if emotions are treated as general constructs or dimensional measures.

**Response format.** Binary (Yes/No).

**Options.** Yes; No.

**emo_potency** – Potency–Control

**Objective.** Identify whether the study classifies emotions considering the potency–control dimension.

**How to code.** Select *Yes* if the study explicitly considers control, dominance, or potency aspects; *No* otherwise.

**Response format.** Binary (Yes/No).

**Options.** Yes; No.

**emo_arousal** – Arousal

**Objective.** Determine whether the study classifies emotions considering arousal levels.

**How to code.** Select *Yes* if the study explicitly considers activation, intensity, or arousal dimensions; *No* if arousal is not mentioned or considered.

**Response format.** Binary (Yes/No).

**Options.** Yes; No.

**emo_methods** – Method of Measuring Emotions

**Objective.** Document the methodological approach used to measure emotions.

**How to code.** Describe the measurement technique (e.g., Likert scales, LIWC, manual coding, automated sentiment/emotion analysis, physiological measures, emoji analysis).

**Response format.** Free text.

**emo_content** – Content Source

**Objective.** Identify the type of content from which emotions were extracted.

**How to code.** Specify the material analyzed (e.g., social media posts, news articles, survey responses, interview transcripts, images, videos).

**Response format.** Free text.

**emo_object** – Associated Object

**Objective.** Register the target or object with which emotions are associated.

**How to code.** Describe what the emotions are directed toward (e.g., political candidates, policies, events, institutions, social groups).

**Response format.** Free text.

### Online Political Participation Variables

**opp_measure_rich** – Online Political Participation Measure

**Objective.** Register the original name of the online political participation variable as described.

**How to code.** Extract the exact terminology used by the authors, preserving original phrasing and conceptual variations across studies.

**Response format.** Free text.

**opp_measure_clean** – Online Political Participation Measure Clean

**Objective.** Categorize measures of online political participation into standardized codes based on the description provided in the original study.

**How to code.** Assign one category using the hierarchical code system. Decision priority: mobilization/institutional → directed communication → basic interactions → consumption. For ambiguous cases, apply channel priority (private channels take precedence) and intention mapping (behavioral intentions coded as target actions). Choose the most specific applicable code (e.g., “share via DM” → 401, not 203).

**Response format.** Categorical (single choice from code system).

**Options.** See detailed code families below.

**Critical coding rules**

**Channel priority.** Private > function (DM/WhatsApp/email → 401 Message (private) even if it is a “share”).

**Intention mapping.** Intention → target action (e.g., “intention to comment” → 202 Comment).

**Specificity.** Prefer the most specific code that matches the description.

**211 vs 702 (no overlap).** 211 = simple sum of L+C+S for one item; 702 = absolute popularity for one item that is broader or platform-defined (e.g., includes reactions, weighted/normalized totals, “total engagement”).

**701 vs 702.** **701** = relative performance (vs history/benchmark); 702 = absolute popularity (within-item total).

**Foundational distinctions**

**Atomic vs composite.** **Atomic** codes = single observable actions (e.g., like, comment, share, repost, post, message, petition, mobilize). Composite codes = indices/scales/aggregates that combine multiple items or computations (e.g., L+C+S sum 211; reactions aggregate 213; standardized OPP index 511; psychometric scales with reliability 212/612; network mobilization indices 611).

**Index vs. scale (terminology).** Use index for summative/aggregate behavioral metrics (e.g., 211, 213, 611, 613). Use scale for psychometric constructs with reliability (e.g., 212, 612).

**Code Families and Definitions**

**A – Information Consumption & Exposure**

**101 – Read/Click.** Reading, viewing, or clicking content for exposure/consumption (atomic).

*Example.* “Intentions to read (click to read more)”.

**102 – Information behavior.** Multi-item indices of information-seeking behaviors with reliability statistics (Index/Composite).

*Examples.* “Information seeking scale (α = .88, 4 items)”; items like “I look for political information online” + “I visit news sites”.

**B – Basic Expressive Interactions**

**201 – Like.** Liking or reacting with emoji/reactions to content (Atomic).

*Example.* “Number of likes” and “angry emoji reactions.”

**202 – Comment.** Commenting or replying with text in public spaces (atomic).

*Example.* “Comment frequency”; “replies”.

**203 – Share.** Generic public share/forward using a platform’s share button or link (Atomic).

*Examples.* “Intention to share a news piece publicly”; share count on a Facebook post.

**204 – Repost.** Platform-native reposting retweet, repost, and quote tweet (Atomic).

*Examples.* “Retweets”; “quote tweets”.

**211 – Engagement.** Simple aggregation of likes + comments + shares (unweighted sum) for a single item (composite).

*Example.* “Interaction = likes + comments + shares.”

**212 – User engagement.** Psychometric scale of engagement intentions/behaviors with reliability (scale/composite).

*Examples.* “Social media intentions (like, comment, **share publicly**, repost), ω = .79”; Likert items such as “I would like political posts”.

**213 – Reactions.** Aggregated reactions (e.g., likes + emoji reactions) for a single item(aggregate/composite).

*Example.* “Digital reactions = likes + emojis.”

**C – Expression & Content Creation**

**301 – Post.** Generic posting frequency without specified political content (atomic).

*Examples.* “Frequency of posting”; “tweets posted about the protest”.

**311 – Political expression.** Multi-item indices of political expression online(Index/Composite).

*Example.* “Online political expression (7 items; α = .92)”.

**312 – Opinion expression.** Scales measuring opinion expression behaviors across contexts (Scale/Composite).

*Example.* “Opinion expression (comment on news, generate graphics, change profile pic)”.

**D – Directed Communication**

**401 – Message.** Private messaging via DM, WhatsApp, Telegram, email, or similar channels (Atomic).

*Examples.* “Sending a political message via DM”; “political discussion via WhatsApp group”.

**411 – Interactive Communication and Discussion.** Measures of interactive communication, conversational reciprocity, and directed discussion behaviors in online political contexts, including discussion intentions, corrective/persuasive participation, and reciprocal engagement patterns (Index/Composite).

*Examples.* "Discussion intention index (α = .90): items like 'I would discuss politics in online groups' and 'I would debate on social media'"; "Initiator interactivity measures reciprocity of thread initiator"; "ratio of replies received to replies given in a political thread"; "Corrective political participation scale (α = .85): 'I try to persuade others online'"; "Discussant Interactivity".

**E – Institutional Online Engagement**

**511 – Online political participation (OPP).** Standardized OPP indices e.g., join groups, encourage others, sign petitions, contact officials (Index/Composite).

*Example.* “OPP (join groups, encourage others, sign petitions, contact officials), α = .88”.

**512 – Petition engagement.** Comprehensive measures of petition-related behaviors in online political contexts, including signing petitions, forwarding to others, seeking information about petitions, and broader intention to engage with petition platforms and causes (Composite).

*Examples.* "Petition action index (seek info; intention to sign; forwarding)"; "Signature Count"; "Petition-related action"; "Sign a petition (Change.org)".

**F – Mobilization & Collective Action**

**601 – Mobilize (call to action).** Calling for or organizing collective action online.

*Examples.* “Calls for collective action”; “organize via hashtag”(Atomic).

**602 – Protest intention.** Intention/likelihood to participate in protests (Atomic).

*Example.* “Intention to protest coded as 1”.

**611 – Mobilization.** Network mobilization indices e.g., attention × diffusion (Index/Composite).

*Example.* “Mobilization = retweets × number of new participants”.

**612 – Collective Action & Social Media Activism.** Multi-item indices and scales measuring online collective action participation and social media activism behaviors, including joining movements, encouraging others, protesting online, and advocating for causes (Index/Composite).

*Examples.* "Online collective action (Ω = .90): protest online; sign online petitions"; "Collective action intentions"; "Activism scale (join movement groups; encourage others to join/protest)"; "Online collective action against climate change".

**G – Performance & Popularity Metrics**

**701 – Performance benchmark.** Relative performance versus baseline/benchmark e.g., own historical average; competitor/industry benchmark (Composite).

*Examples.* “Overperforming vs last 100 posts”; video views compared to channel average; engagement above competitor benchmark.

**702 – Popularity.** Absolute popularity for a single item/post, aggregating likes, comments, shares, and reactions or platform-defined “total engagement” (Aggregate/Composite).

*Examples.* Total likes + comments + shares + reactions on a post; platform-reported total engagement for one item.

**opp_explicit_oper** – Explicit Operationalization of OPP

**Objective.** Determine whether the study provides explicit operationalization of the online political participation variable.

**How to code.** Select *Yes* if a clear definition, measurement procedure, or theoretical framework is provided; *No* if operationalization is absent or unclear.

**Response format.** Binary (Yes/No).

**Options.** Yes; No.

**opp_methods** – Method of Measuring Online Political Participation

**Objective.** Document the methodological approach used to measure online political participation.

**How to code.** Describe the measurement technique (e.g., survey scales, behavioral tracking, content analysis, platform APIs, manual coding).

**Response format.** Free text.

**opp_methods_add** – Additional Information on OPP Measurement

**Objective.** Provide detailed information when OPP is measured using complex instruments.

**How to code.** If OPP uses scales, item sets, or complex instruments, provide reliability statistics (α, ω), number of items, and a brief description of components.

**Response format.** Free text.

**Dependency.** Fill when opp_methods indicates scale/index measurement.

**opp_dm** – Digital Media Used

**Objective.** Identify the digital media platform(s) used to assess political participation.

**How to code.** Specify the platform(s) analyzed (e.g., Twitter, Facebook, WhatsApp, Instagram, YouTube, TikTok, Reddit). For multiple platforms, list all or indicate “multiple platforms.”

**Response format.** Free text.

**opp_pt_rich** – Political Topic

**Objective.** Register the original political topic, issue, or domain addressed in the study.

**How to code.** Extract the exact description of political context used by the authors, preserving original terminology and scope.

**Response format.** Free text.

**opp_pt_clean** – Political Topic Clean

**Objective.** Categorize the primary topic or theme of online political participation studies into standardized categories.

**How to code.** Assign a **single** category based on the main focus. **Precedence:** Elections priority when the focus is the electoral process → specific issues → civil rights. **Heuristic:** “What is this study primarily examining?”

**Response format.** Categorical (single choice).

**Options.** 1. Elections, voting, and campaigning; 2. Political communication of politicians/political parties; 3. Immigration/refugees; 4. Protest; 5. Climate change and climate policy; 6. Healthcare; 7. Women and minority rights/issues; 8. Authoritarianism/Autocratization; 9. Foreign policy & war/military; 10. Populism & extremism; 11. Other.

**Coding Principles (topic coding)**

**Primary Focus.** Code based on the main topic, not peripheral mentions.

**Precedence Rules.** Elections priority when focus is electoral process; specific issues > civil rights; protest priority when explicit protest/march/rally language appears.

**Categories**

**Elections, Voting, and Campaigning:** Elections, voting processes, political campaigns, and electoral candidates.

**Political Communication of Politicians/Political Parties:** Official communication from politicians or parties outside electoral contexts.

**Immigration/Refugees:** Immigration policy, refugee issues, asylum, and border control.

**Protest:** Explicit protests, demonstrations, marches, rallies, or strikes.

**Climate Change and Climate Policy:** Climate change, global warming, emissions, and climate policy.

**Healthcare:** Public health issues and COVID-19 responses.

**Women and Minority Rights/Issues:** Women’s rights, gender equality, minority rights.

**Authoritarianism/Autocratization:** Issues related to authoritarianism, autocratization and democratic governance.

**Foreign Policy & War/Military:** Foreign policy, war, and military-related issues.

**Populism & Extremism:** Populist movements and political extremism.

**Other:** Topics that do not fit into standard categories.

### Outcomes and Effects

**relationship_variable** – Relationship Type

**Objective.** Identify the type of statistical relationship found between variables.

**How to code.** Select the category that best describes the analytical relationship reported by authors. Choose **Causal Effects** for experimental designs or explicit causal inference; **Correlations** for associational relationships; **Can’t tell** when methodology is unclear or insufficient for determination.

**Response format.** Categorical (single choice).

**Options.** Causal Effects; Correlations; Can’t tell.

**mediation_analysis** – Mediation Analysis Conducted

**Objective.** Determine whether the study performed formal mediation analysis.

**How to code.** Select *Yes* if the study explicitly conducts mediation analysis using established methods; *No* if no mediation analysis is performed.

**Response format.** Binary (Yes/No).

**Options.** Yes; No.

**emotion_as_mediator** – Emotion as Mediator

**Objective.** Identify whether emotion variables are tested as mediators in the analytical model.

**How to code.** Select *Yes* if an emotion variable is positioned as mediator in the causal pathway; *No* if emotion is independent, dependent, or moderator variable.

**Response format.** Binary (Yes/No).

**Options.** Yes; No.

**iv** – Independent Variable

**Objective.** Document the independent variable(s) in the reported effect.

**How to code.** Describe the predictor variable according to standardized categories from Emotion Measure Clean or Online Political Participation Measure Clean when applicable, or specify other variables (e.g., demographic, contextual, experimental conditions).

**Response format.** Free text.

**mediation** – Mediation

**Objective.** Identify mediating variable(s) when mediation analysis is conducted.

**How to code.** Describe the mediating variable according to standardized categories from Emotion Measure Clean or Online Political Participation Measure Clean when applicable, or specify other mediating mechanisms.

**Response format.** Free text.

**Dependency.** Fill only if mediation_analysis = Yes.

**dv** – Dependent Variable

**Objective.** Document the dependent variable(s) in the reported effect.

**How to code.** Describe the outcome variable according to standardized categories from Emotion Measure Clean or Online Political Participation Measure Clean when applicable, or specify other outcome variables (e.g., political attitudes, behavioral intentions, engagement metrics).

**Response format.** Free text.

**effect** – Effect Direction

**Objective.** Indicate the conceptual direction between the coded Emotion Measure Clean and Online Political Participation Measure Clean.

**How to code.** Use the authors’ interpretation (abstract/results/discussion), ignore statistical significance. Code: 1 = increases/facilitates, 0 = neutral/none, -1 = decreases/inhibits.

**Examples.** 1: “anger increases sharing”; 0: “no clear effect”; -1: “fear decreases commenting”.

**Response format.** Categorical (single choice).

**Options.** 1 – Positive; 0 – Neutral; -1 – Negative.

**hetero_effects** – Heterogeneity of Effects

**Objective.** Determine whether effects vary across different subgroups or conditions.

**How to code.** Select *Yes* if the study reports differential effects across demographics, platforms, time periods, or other moderating factors; *No* if uniform effects are reported; *Can’t tell* if insufficient information for determination.

**Response format.** Categorical (single choice).

**Options.** Yes; No; Can’t tell.

**author_description** – Author’s Description

**Objective.** Preserve the original author interpretation of findings.

**How to code.** Copy the exact textual description or interpretation of the relationship as provided by the study authors, focusing on results and discussion sections.

**Response format.** Free text (direct quotation).

### Quality Assessment

**score_mmat** – Score MMAT

**Objective.** Register the final methodological quality score using the Mixed Methods Appraisal Tool.

**How to code.** Compute as the proportion of “Yes” responses to applicable MMAT criteria divided by the total applicable criteria for the study’s design category (exclude non-applicable items from the denominator). Range: 0.00–1.00.

**Response format.** Numeric (decimal, 0.00–1.00).

**pre_registered** – Pre-Registered

**Objective.** Determine whether the study pre-registered its hypotheses and research questions.

**How to code.** Select *Yes* if the paper explicitly mentions preregistration on a recognized platform (e.g., OSF, AsPredicted, clinical trial registries); *No* if absent or only post-hoc.

**Response format.** Binary (Yes/No).

**Options.** Yes; No.

**open_data** – Open Data

**Objective.** Identify whether study data and/or analytical scripts are openly accessible.

**How to code.** Select *Yes* if data/scripts are available in public repositories (e.g., OSF, GitHub, journal supplements, institutional repositories); *No* if not shared or only “upon request.”

**Response format.** Binary (Yes/No).

**Options.** Yes; No.

**competing_interest** – Competing Interest

**Objective.** Document whether authors declared competing interests.

**How to code.** Select *Yes* if the paper includes an explicit competing-interests/conflicts statement; *No* if it states none or provides no statement.

**Response format.** Binary (Yes/No).

**Options.** Yes; No.

**competing_interest_description** – Competing Interest Description

**Objective.** Specify the nature of competing interests when declared.

**How to code.** Copy the exact statement as reported (e.g., funding sources, institutional affiliations, commercial relationships).

**Response format.** Free text.

**Dependency.** Fill only if competing_interest = Yes.

### Mixed Methods Appraisal Tool (MMAT) Version 2018

**mmat_category** – Category of Study Designs According to MMAT

Indicate the methodological category that best represents the study design to determine which MMAT criteria should be applied.

**Options**: 1. Qualitative Studies; 2. Randomized Controlled Trials; 3. Non-Randomized Studies; 4. Quantitative Descriptive Studies; 5. Mixed Methods Studies

**mmat_s1** – Clear Research Questions

Are there clear research questions?

**Options**: Yes; No; Can't tell

**mmat_s2** – Data Address Research Questions

Do the collected data allow to address the research questions?

**Options**: Yes; No; Can't tell

**mmat_1_1** – Qualitative Approach Appropriate

Is the qualitative approach appropriate to answer the research question?

**Options**: Yes; No; Can't tell

**mmat_1_2** – Qualitative Data Collection Methods

Are the qualitative data collection methods adequate to address the research question?

**Options**: Yes; No; Can't tell

**mmat_1_3** – Findings Derived from Data

Are the findings adequately derived from the data?

**Options**: Yes; No; Can't tell

**mmat_1_4** – Interpretation Substantiated

Is the interpretation of results sufficiently substantiated by data?

**Options**: Yes; No; Can't tell

**mmat_1_5** – Qualitative Coherence

Is there coherence between qualitative data sources, collection, analysis and interpretation?

**Options**: Yes; No; Can't tell

**mmat_2_1** – Randomization Performance

Is randomization appropriately performed?

**Options**: Yes; No; Can't tell

**mmat_2_2** – Groups Comparable at Baseline

Are the groups comparable at baseline?

**Options**: Yes; No; Can't tell

**mmat_2_3** – Complete Outcome Data (RCT)

Are there complete outcome data?

**Options**: Yes; No; Can't tell

**mmat_2_4** – Outcome Assessors Blinded

Are outcome assessors blinded to the intervention provided?

**Options**: Yes; No; Can't tell

**mmat_2_5** – Participant Adherence

Did the participants adhere to the assigned intervention?

**Options**: Yes; No; Can't tell

**mmat_3_1** – Participants Representative

Are the participants representative of the target population?

**Options**: Yes; No; Can't tell

**mmat_3_2** – Appropriate Measurements

Are measurements appropriate regarding both the outcome and intervention (or exposure)?

**Options**: Yes; No; Can't tell

**mmat_3_3** – Complete Outcome Data (Non-RCT)

Are there complete outcome data?

**Options**: Yes; No; Can't tell

**mmat_3_4** – Confounders Accounted

Are the confounders accounted for in the design and analysis?

**Options**: Yes; No; Can't tell

**mmat_3_5** – Intervention as Intended

During the study period, is the intervention administered (or exposure occurred) as intended?

**Options**: Yes; No; Can't tell

**mmat_4_1** – Sampling Strategy Relevant

Is the sampling strategy relevant to address the research question?

**Options**: Yes; No; Can't tell

**mmat_4_2** – Sample Representative

Is the sample representative of the target population?

**Options**: Yes; No; Can't tell

**mmat_4_3** – Measurements Appropriate

Are the measurements appropriate?

**Options**: Yes; No; Can't tell

**mmat_4_4** – Low Nonresponse Bias

Is the risk of nonresponse bias low?

**Options**: Yes; No; Can't tell

**mmat_4_5** – Statistical Analysis Appropriate

Is the statistical analysis appropriate to answer the research question?

**Options**: Yes; No; Can't tell

**mmat_5_1** – Mixed Methods Rationale

Is there an adequate rationale for using a mixed methods design to address the research question?

**Options**: Yes; No; Can't tell

**mmat_5_2** – Components Integration

Are the different components of the study effectively integrated to answer the research question?

**Options**: Yes; No; Can't tell

**mmat_5_3** – Integration Outputs Interpreted

Are the outputs of the integration of qualitative and quantitative components adequately interpreted?

**Options**: Yes; No; Can't tell

**mmat_5_4** – Divergences Addressed

Are divergences and inconsistencies between quantitative and qualitative results adequately addressed?

**Options**: Yes; No; Can't tell

**mmat_5_5** – Quality Criteria Adherence

Do the different components of the study adhere to the quality criteria of each tradition of the methods involved?

**Options**: Yes; No; Can't tell

## List of included studies

Ahmed, S., Jaidka, K., & Cho, J. (2017). Tweeting India’s Nirbhaya protest: A study of emotional dynamics in an online social movement. *Social Movement Studies*, *16*(4), 447–465. <https://doi.org/10.1080/14742837.2016.1192457>

Al-Hasan, A., Yim, D., & Lucas, H. C. (2019). A Tale of Two Movements: Egypt During the Arab Spring and Occupy Wall Street. *IEEE Transactions on Engineering Management*, *66*(1), 84–97. <https://doi.org/10.1109/TEM.2018.2812194>

Antypas, D., Preece, A., & Camacho-Collados, J. (2023). Negativity spreads faster: A large-scale multilingual twitter analysis on the role of sentiment in political communication. *Online Social Networks and Media*, *33*, 100242. <https://doi.org/10.1016/j.osnem.2023.100242>

Bagić Babac, M. (2024). Emotional showdown on social media: Analyzing user reactions to the 2016 US presidential campaign. *Global Knowledge, Memory and Communication*, *74*(11), 19–41. <https://doi.org/10.1108/GKMC-02-2023-0060>

Bang, C. C., Lee, J., & Rao, H. R. (2021). The Egyptian protest movement in the twittersphere: An investigation of dual sentiment pathways of communication. *International Journal of Information Management*, *58*, 102328. <https://doi.org/10.1016/j.ijinfomgt.2021.102328>

Bene, M. (2017). Go viral on the Facebook! Interactions between candidates and followers on Facebook during the Hungarian general election campaign of 2014. *Information, Communication & Society*, *20*(4), 513–529. <https://doi.org/10.1080/1369118X.2016.1198411>

Bil-Jaruzelska, A., & Monzer, C. (2022). All About Feelings? Emotional Appeals as Drivers of User Engagement With Facebook Posts. *Politics and Governance*, *10*(1), 172–184. <https://doi.org/10.17645/pag.v10i1.4758>

Blassnig, S., Udris, L., Staender, A., & Vogler, D. (2021). Popularity on Facebook During Election Campaigns: An Analysis of Issues and Emotions in Parties’ Online Communication. *International Journal of Communication*, *15*. <https://ijoc.org/index.php/ijoc/article/view/17040/3573>

Bobba, G. (2019). Social media populism: Features and ‘likeability’ of Lega Nord communication on Facebook. *European Political Science*, *18*(1), 11–23. <https://doi.org/10.1057/s41304-017-0141-8>

Bossetta, M., & Schmøkel, R. (2023). Cross-Platform Emotions and Audience Engagement in Social Media Political Campaigning: Comparing Candidates’ Facebook and Instagram Images in the 2020 US Election. *Political Communication*, *40*(1), 48–68. <https://doi.org/10.1080/10584609.2022.2128949>

Brady, W. J., Gantman, A. P., & Van Bavel, J. J. (2020). Attentional capture helps explain why moral and emotional content go viral. *Journal of Experimental Psychology: General*, *149*(4), 746–756. <https://doi.org/10.1037/xge0000673>

Brannon, T. N. (2023). Racism hurts, can antiracism heal?: Positive mental health correlates of antiracist engagement. *PNAS Nexus*, *2*(10), pgad309. <https://doi.org/10.1093/pnasnexus/pgad309>

Casas, A., & Williams, N. W. (2019). Images that Matter: Online Protests and the Mobilizing Role of Pictures. *Political Research Quarterly*, *72*(2), 360–375. <https://doi.org/10.1177/1065912918786805>

Chen, H.-T., Ping, S., & Chen, G. (2015). Far from reach but near at hand: The role of social media for cross-national mobilization. *Computers in Human Behavior*, *53*, 443–451. <https://doi.org/10.1016/j.chb.2015.05.052>

Chou, S., & Roy, D. (2017). Nasty, Brutish, and Short: What Makes Election News Popular on Twitter? *Proceedings of the International AAAI Conference on Web and Social Media*, *11*(1), 492–495. <https://doi.org/10.1609/icwsm.v11i1.14967>

Dal, A., & Nisbet, E. C. (2022). To Share or Not to Share? How Emotional Judgments Drive Online Political Expression in High-Risk Contexts. *Communication Research*, *49*(3), 353–375. <https://doi.org/10.1177/0093650220950570>

Dal, A., Nisbet, E. C., & Kamenchuk, O. (2023). Signaling silence: Affective and cognitive responses to risks of online activism about corruption in an authoritarian context. *New Media & Society*, *25*(3), 646–664. <https://doi.org/10.1177/14614448221135861>

Dang-Xuan, L., & Stieglitz, S. (2021). Impact and Diffusion of Sentiment in Political Communication – An Empirical Analysis of Political Weblogs. *Proceedings of the International AAAI Conference on Web and Social Media*, *6*(1), 427–430. <https://doi.org/10.1609/icwsm.v6i1.14326>

Dang-Xuan, L., Stieglitz, S., Wladarsch, J., & Neuberger, C. (2013). AN INVESTIGATION OF INFLUENTIALS AND THE ROLE OF SENTIMENT IN POLITICAL COMMUNICATION ON TWITTER DURING ELECTION PERIODS. *Information, Communication & Society*, *16*(5), 795–825. <https://doi.org/10.1080/1369118X.2013.783608>

Del Valle, M. E., Wanless-Berk, A., Gruzd, A., & Mai, P. (2018a). I Click, Therefore I Am: Predicting Clicktivist-Like Actions on Candidates’ Facebook Posts During the 2016 US Primary Election. In B. Wellman, L. Robinson, C. Brienza, W. Chen, & S. R. Cotten (Eds), *Studies in Media and Communications* (Vol. 17, pp. 137–154). Emerald Publishing Limited. <https://doi.org/10.1108/S2050-206020180000017008>

Del Valle, M. E., Wanless-Berk, A., Gruzd, A., & Mai, P. (2018b). Unpredictably Trump?: Predicting Clicktivist-like Actions on Trump’s Facebook Posts During the 2016 U.S. Primary Election. *Proceedings of the 9th International Conference on Social Media and Society*, 64–70. <https://doi.org/10.1145/3217804.3217898>

DiRusso, C., & Myrick, J. G. (2021). Sustainability in CSR Messages on Social Media: How Emotional Framing and Efficacy Affect Emotional Response, Memory and Persuasion. *Environmental Communication*, *15*(8), 1045–1060. <https://doi.org/10.1080/17524032.2021.1933120>

Donaway, R. (2020). *Faces or Objects?: An Examination of Emojis in Facebook News Teasers and User Engagement* [Washington State University]. <https://www.proquest.com/openview/22519553a98adfe497b793ab3532ddd7/1?cbl=18750&diss=y&pq-origsite=gscholar>

Doroshenko, L., & Tu, F. (2023). Like, Share, Comment, and Repeat: Far-right Messages, Emotions, and Amplification in Social Media. *Journal of Information Technology & Politics*, *20*(3), 286–302. <https://doi.org/10.1080/19331681.2022.2097358>

Elliott-Negri, L., Tu, S., Zheng, W., & Lennon, M. C. (2022). Hope, Emotional Charges, and Online Action: An Experimental Study of the DREAM Act. *Social Problems*, *69*(3), 781–798. <https://doi.org/10.1093/socpro/spaa076>

Elnoshokaty, A. S., Deng, S., & Kwak, D.-H. (2016). Success Factors of Online Petitions: Evidence from Change.org. *2016 49th Hawaii International Conference on System Sciences (HICSS)*, 1979–1985. <https://doi.org/10.1109/HICSS.2016.249>

Foster, M. D., Hennessey, E., Blankenship, B. T., & Stewart, A. (2019). Can ‘slacktivism’ work? Perceived power differences moderate the relationship between social media activism and collective action intentions through positive affect. *Cyberpsychology: Journal of Psychosocial Research on Cyberspace*, *13*(4). <https://doi.org/10.5817/CP2019-4-6>

Frischlich, L., Clever, L., Wulf, T., Wildschut, T., & Sedikides, C. (2023). Populists’ Use of Nostalgia: A Supervised Machine Learning Approach. *International Journal of Communication*, *17*. <https://ijoc.org/index.php/ijoc/article/view/19063/4102>

Gainous, J., Vélez Serrano, M., & Wagner, K. M. (2023). Protesting With Feeling in Puerto Rico: Twitter and El Verano Del 19. *Political Research Quarterly*, *76*(2), 465–480. <https://doi.org/10.1177/10659129231161286>

Gan, C., Lee, F. L. F., & Li, Y. (2017). Social media use, political affect, and participation among university students in urban China. *Telematics and Informatics*, *34*(7), 936–947. <https://doi.org/10.1016/j.tele.2017.04.002>

Gerbaudo, P., De Falco, C. C., Giorgi, G., Keeling, S., Murolo, A., & Nunziata, F. (2023). Angry Posts Mobilize: Emotional Communication and Online Mobilization in the Facebook Pages of Western European Right-Wing Populist Leaders. *Social Media + Society*, *9*(1), 20563051231163327. <https://doi.org/10.1177/20563051231163327>

Gerbaudo, P., Marogna, F., & Alzetta, C. (2019). When “Positive Posting” Attracts Voters: User Engagement and Emotions in the 2017 UK Election Campaign on Facebook. *Social Media + Society*, *5*(4), 2056305119881695. <https://doi.org/10.1177/2056305119881695>

Gil-Lopez, T., & Shen, C. (2021). “Go, Vote, and Tweet It”: Interactivity in Online Protest-Related Discussions About the 2014 Catalan Referendum for Independence. *International Journal of Communication*, *15*. <https://ijoc.org/index.php/ijoc/article/view/15700/3538>

Gondwe, G. (2020). Incivility, Online Participation, and Message Delivery in the 2019 Hong Kong Protests: Exploring the Relationship. *Online Journal of Communication and Media Technologies*, *10*(4), e202022. <https://doi.org/10.30935/ojcmt/8397>

Hagemann, L., & Abramova, O. (2023). Emotions and Information Diffusion on Social Media: A Replication in the Context of Political Communication on Twitter. *AIS Transactions on Replication Research*, *9*(1), 1–19. <https://doi.org/10.17705/1atrr.00079>

Heidenreich, T., Eisele, O., Watanabe, K., & Boomgaarden, H. G. (2022). Exploring Engagement With EU News on Facebook: The Influence of Content Characteristics. *Politics and Governance*, *10*(1), 121–132. <https://doi.org/10.17645/pag.v10i1.4775>

Heiss, R. (2021). The Affective Foundation of Political Opinion Expression on Social Media: A Panel Analysis. *International Journal of Public Opinion Research*, *33*(1), 57–75. <https://doi.org/10.1093/ijpor/edaa009>

Heiss, R., Schmuck, D., & Matthes, J. (2019). What drives interaction in political actors’ Facebook posts? Profile and content predictors of user engagement and political actors’ reactions. *Information, Communication & Society*, *22*(10), 1497–1513. <https://doi.org/10.1080/1369118X.2018.1445273>

Hutchens, M. J., Silva, D. E., Hmielowski, J. D., & Cicchirillo, V. J. (2019). What’s in a username? Civility, group identification, and norms. *Journal of Information Technology & Politics*, *16*(3), 203–218. <https://doi.org/10.1080/19331681.2019.1633983>

Kabir, E. (2023). *#StopAsianHate Counterspeech on Twitter: Effectiveness of Counterspeech Strategies and Geospatial Analysis*. College of Bowling Green State University.

Keib, K., Himelboim, I., & Han, J.-Y. (2018). Important tweets matter: Predicting retweets in the #BlackLivesMatter talk on twitter. *Computers in Human Behavior*, *85*, 106–115. <https://doi.org/10.1016/j.chb.2018.03.025>

Keller, T. R., & Kleinen-von Königslöw, K. (2018). Pseudo-discursive, mobilizing, emotional, and entertaining: Identifying four successful communication styles of political actors on social media during the 2015 Swiss national elections. *Journal of Information Technology & Politics*, *15*(4), 358–377. <https://doi.org/10.1080/19331681.2018.1510355>

Kim, J., & Yoo, J. (2012). Role of Sentiment in Message Propagation: Reply vs. Retweet Behavior in Political Communication. *2012 International Conference on Social Informatics*, 131–136. <https://doi.org/10.1109/SocialInformatics.2012.33>

Kim, S. J., Villanueva, I. I., & Chen, K. (2024). Going Beyond Affective Polarization: How Emotions and Identities are Used in Anti-Vaccination TikTok Videos. *Political Communication*, *41*(4), 588–607. <https://doi.org/10.1080/10584609.2023.2243852>

Klinger, U., Koc-Michalska, K., & Russmann, U. (2023). Are Campaigns Getting Uglier, and Who Is to Blame? Negativity, Dramatization and Populism on Facebook in the 2014 and 2019 EP Election Campaigns. *Political Communication*, *40*(3), 263–282. <https://doi.org/10.1080/10584609.2022.2133198>

Koenig, A., & McLaughlin, B. (2018). Change is an emotional state of mind: Behavioral responses to online petitions. *New Media & Society*, *20*(4), 1658–1675. <https://doi.org/10.1177/1461444817689951>

Kušen, E., & Strembeck, M. (2018). On the Public Perception of Police Forces in Riot Events—The Role of Emotions in Three Major Social Networks During the 2017 G20 Riots: *Proceedings of the 3rd International Conference on Complexity, Future Information Systems and Risk*, 120–127. <https://doi.org/10.5220/0006763301200127>

Lee, C. S., & Colautti, J. D. (2022). ISIS’s COVID-19 Messaging on Twitter: An Analysis of Tweet Sentiment and Emotions. *Crime & Delinquency*, *68*(8), 1347–1370. <https://doi.org/10.1177/00111287221083881>

Lu, Y. (2019). Incidental Exposure to Political Disagreement on Facebook and Corrective Participation: Unraveling the Effects of Emotional Responses and Issue Relevance. *International Journal of Communication*, *13*. <https://ijoc.org/index.php/ijoc/article/view/9235/2573>

Lu, Y., & Gall Myrick, J. (2016). Cross-Cutting Exposure on Facebook and Political Participation: Unraveling the Effects of Emotional Responses and Online Incivility. *Journal of Media Psychology*, *28*(3), 100–110. <https://doi.org/10.1027/1864-1105/a000203>

Metz, M., Kruikemeier, S., & Lecheler, S. (2020). Personalization of politics on Facebook: Examining the content and effects of professional, emotional and private self-personalization. *Information, Communication & Society*, *23*(10), 1481–1498. <https://doi.org/10.1080/1369118X.2019.1581244>

Min, H., & Yun, S. (2019). Role of Social Media and Emotion in South Korea’s Presidential Impeachment Protests. *Issues & Studies*, *55*(01), 1950002. <https://doi.org/10.1142/S1013251119500024>

Molder, A. L., Lakind, A., Clemmons, Z. E., & Chen, K. (2022). Framing the Global Youth Climate Movement: A Qualitative Content Analysis of Greta Thunberg’s Moral, Hopeful, and Motivational Framing on Instagram. *The International Journal of Press/Politics*, *27*(3), 668–695. <https://doi.org/10.1177/19401612211055691>

Parycek, P., Schöllhammer, R., & Schossböck, J. (2015). Emotions and E-participation of Young People: A Preliminary Study. *2015 48th Hawaii International Conference on System Sciences*, 2415–2424. <https://doi.org/10.1109/HICSS.2015.289>

Peeters, J., Opgenhaffen, M., Kreutz, T., & Van Aelst, P. (2023). Understanding the online relationship between politicians and citizens. A study on the user engagement of politicians’ Facebook posts in election and routine periods. *Journal of Information Technology & Politics*, *20*(1), 44–59. <https://doi.org/10.1080/19331681.2022.2029791>

Pivecka, N., Ratzinger, R. A., & Florack, A. (2022). Emotions and virality: Social transmission of political messages on Twitter. *Frontiers in Psychology*, *13*, 931921. <https://doi.org/10.3389/fpsyg.2022.931921>

Roden, J., & Saleem, M. (2022). White Apathy and Allyship in Uncivil Racial Social Media Comments. *Mass Communication and Society*, *25*(3), 383–406. <https://doi.org/10.1080/15205436.2021.1955933>

Ruiz-Dodobara, F., Villanueva Moran, A. R., & Escurra Mayaute, L. M. (2023). Redes sociales y acción colectiva contra el cambio climático en estudiantes universitarios peruanos. *Comunicación y Sociedad*, 1–25. <https://doi.org/10.32870/cys.v2023.8413>

Sanford, M., Witkowska, M., Gifford, R., & Formanowicz, M. (2023). Emotional framing in online environmental activism: Pairing a Twitter study with an offline experiment. *Frontiers in Psychology*, *13*, 1099331. <https://doi.org/10.3389/fpsyg.2022.1099331>

Segado-Boj, F., Díaz-Campo, J., & Navarro-Sierra, N. (2020). Emociones y difusión de noticias sobre el cambio climático en redes sociales. Influencia de hábitos, actitudes previas y usos y gratificaciones en universitarios. *Revista Latina*, *75*, 245–269. <https://doi.org/10.4185/RLCS-2020-1425>

Stieglitz, S., & Dang-Xuan, L. (2011). The Role of Sentiment in Information Propagation on Twitter – An Empirical Analysis of Affective Dimensions in Political Tweets. *ACIS 2011 Proceedings*, *38*.

Stieglitz, S., & Dang-Xuan, L. (2013). Emotions and Information Diffusion in Social Media—Sentiment of Microblogs and Sharing Behavior. *Journal of Management Information Systems*, *29*(4), 217–248. <https://doi.org/10.2753/MIS0742-1222290408>

Švelch, J., & Štětka, V. (2016). The coup that flopped: Facebook as a platform for emotional protest. *First Monday*. <https://doi.org/10.5210/fm.v21i1.6333>

Svetlov, K., & Platonov, K. (2019). Sentiment Analysis of Posts and Comments in the Accounts of Russian Politicians on the Social Network. *2019 25th Conference of Open Innovations Association (FRUCT)*, 299–305. <https://doi.org/10.23919/FRUCT48121.2019.8981501>

Tarullo, R. (2020). Emotive and Positive Political Communication on Facebook: The Case of Argentinean Leaders. *Romanian Journal of Communication and Public Relations*, *22*(1), 31–53. <https://doi.org/10.21018/rjcpr.2020.1.286>

Tian, Y., Zhang, X., Yamamoto, M., & Morey, A. C. (2020). Cynicism, insults, and emotions in the 2016 U.S. presidential election: An affective intelligence framework. *Journal of Information Technology & Politics*, *17*(4), 321–336. <https://doi.org/10.1080/19331681.2020.1715908>

Villagrán, L., Reyes-Valenzuela, C., Alzugaray, C., Zumárraga-Espinosa, M., & Méndez, J. (2023). The mediating role of emotions in offline and online political participation: A post-social outbreak study in Ecuador and Chile. *Frontiers in Psychology*, *13*. <https://www.frontiersin.org/articles/10.3389/fpsyg.2022.1111184>

Vučković, M. (2023). Politicizing, Personalizing, and Mobilizing in Online Political Communication: Drivers and Killers of Users’ Engagement. *International Journal of Communication*, *17*. <https://ijoc.org/index.php/ijoc/article/view/19500/4155>

Vučković, M., & Oblak Črnič, T. (2021). Emotionalization and Privatization of Political Communication on Facebook: Stimulating Factors for Citizens’ Interactions? *Medijske Studije*, *11*(22), 3–23. <https://doi.org/10.20901/ms.11.22.1>

Wallace, L. N. (2021). Parents’ political activism on social media: The role of emotional engagement and perceived (in)civility. *The Social Science Journal*, 1–14. <https://doi.org/10.1080/03623319.2021.1969881>

Walsh, J. P. (2022). Digital media and international migration: Twitter discourse during the Canadian federal election. *International Migration*, *60*(1), 152–172. <https://doi.org/10.1111/imig.12836>

Young, L. E. (2023). Mobilization Under Threat: Emotional Appeals and Pro-Opposition Political Participation Online. *Political Behavior*, *45*(2), 445–468. <https://doi.org/10.1007/s11109-021-09711-z>

Yousefinaghani, S., Dara, R., Mubareka, S., Papadopoulos, A., & Sharif, S. (2021). An analysis of COVID-19 vaccine sentiments and opinions on Twitter. *International Journal of Infectious Diseases*, *108*, 256–262. <https://doi.org/10.1016/j.ijid.2021.05.059>

Zerback, T., & Wirz, D. S. (2021). Appraisal patterns as predictors of emotional expressions and shares on political social networking sites. *Studies in Communication Sciences*, *21*(1). <https://doi.org/10.24434/j.scoms.2021.01.003>

Zhang, J., Wang, S., Zheng, W., & Wang, L. (2019). The prediction role of feeling of injustice on network social mobilization. *International Journal of Crowd Science*, *3*(2), 155–167. <https://doi.org/10.1108/IJCS-01-2019-0008>

Zhang, N., & Skoric, M. M. (2020). Getting their Voice Heard: Chinese Environmental NGO’s Weibo Activity and Information Sharing. *Environmental Communication*, *14*(6), 844–858. <https://doi.org/10.1080/17524032.2020.1758184>

## Inter-rater agreement

One primary reviewer screened and extracted data for the entire sample across all phases of the systematic review. To assess inter-rater reliability, two independent reviewers evaluated random samples in each of the three phases: primary screening (10.82% of records), secondary screening (11.85% of records), and data extraction (14.47% of studies). During the primary screening, when reviewers disagreed about inclusion, the record automatically advanced to the secondary screening rather than being excluded. Inter-rater reliability was automatically calculated in DistillerSR using Cohen's kappa coefficient (Cohen, 1960).

Kappa values were interpreted according to Landis and Koch (1977): κ < 0.00 = poor; 0.00–0.20 = slight; 0.21–0.40 = fair; 0.41–0.60 = moderate; 0.61–0.80 = substantial; and 0.81–1.00 = almost perfect.

All disagreements in the tested samples were resolved through discussions between the reviewers. When the reviewers could not reach a consensus, a third reviewer (senior author) independently evaluated the case and made the final decision.

After completing the reliability analysis and resolving all disagreements, the primary reviewer (1) systematically reviewed the patterns identified in disagreements, (2) identified categories or definitions requiring clarification, (3) reviewed codings for the complete sample to verify consistency with the established consensus, and (4) updated codings when appropriate to ensure that the entire database reflected the consensus criteria. This protocol ensured that the quality demonstrated in the tested sample extended to the entire data set.

**Table A6**Reliability Summary Across All Phases

| **Phase** | **Sample tested** | **Kappa (κ)** | **Interpretation** |
| --- | --- | --- | --- |
| Primary screening (title/abstract) | 10.82% (494/4,562) | 0.65 | Substantial |
| Secondary screening (full-text) | 11.85% (39/329) | 0.90 | Almost perfect |
| Extraction - Characteristics | 14.47% (11/76) | 1.00 | Perfect |
| Extraction - MMAT | 14.47% (11/76) | 0.97 | Almost perfect |
| Extraction - Outcomes (key variables) | 14.47% (11/76) | 0.91 | Almost perfect |

Note. Reliability indices demonstrated consistently high methodological quality across all phases of the systematic review, with Kappas ranging from 0.65 (substantial) to 1.00 (perfect). All disagreements were resolved through discussion between the reviewers or third-party adjudication, and an established consensus was systematically applied to the complete sample.

**Table A7**
Kappa (κ) for Key Variables (Outcomes)

| **Category** | **Specific variable** | **κ** | **Interpretation** |
| --- | --- | --- | --- |
| Emotions |  |  |  |
|  | emo_measure_clean (type) | 1.00 | Perfect |
|  | Emotional valence | 1.00 | Perfect |
|  | Discrete emotion (specific vs general) | 0.77 | Substantial |
| Participation |  |  |  |
|  | opp_measure_clean (specific type) | 0.89 | Almost perfect |
|  | opp_measure_categories (broad) | 0.85 | Almost perfect |
| Effect |  |  |  |
|  | Effect direction (+/0/-) | 0.82 | Almost perfect |

Note. The critical variables are highlighted in bold. An overall Kappa of 0.91 for the outcomes domain reflected high reliability in extracting key variables of the systematic review.

# Sensitivity Analysis: Methods and Detailed Results

## Methodological Foundation

We conducted this sensitivity analysis according to the Synthesis Without Meta-analysis (SWiM) guidelines (Campbell et al., 2020) and Cochrane Handbook recommendations on qualitative sensitivity analysis (Noyes et al., 2019) and narrative synthesis (McKenzie & Brennan, 2019). We employed effect-direction vote counting as the primary analytical method (Cumpston et al., 2023).

We conducted analyses at two levels: (1) study level (n=76) to assess methodological quality (MMAT scores), transparency practices (preregistration, open data, conflict of interest declarations), and study design; and (2) association level (n=139) to examine heterogeneity in effect direction across digital platforms, political contexts, and cultural geographies.

## Sensitivity Criteria and Quality Threshold

We classified studies as "high quality" when MMAT ≥ 0.6, corresponding to 3 or more of the 5 methodological criteria being met (Hong et al., 2018). The rationale for this threshold was threefold. Empirically, in public health systematic reviews, a 60% threshold of criteria met is frequently used as a cutoff for methodologically adequate studies (Pluye et al., 2009). Pragmatically, scores <0.6 indicate violation of three or more fundamental criteria, compromising internal validity (Hong et al., 2018). Additionally, this criterion aligns with MMAT's own categorizations, in which scores of 0.4–0.6 are considered "limited quality" and ≥ 0.6 "adequate quality."

**Sensitivity thresholds were established based on narrative synthesis conventions (Popay et al., 2006; Rodgers et al., 2009) and judgments of substantive relevance in political communication research. We classified differences as robust (≤10pp) when substantively negligible, indicating that the effects maintained a similar direction and magnitude across subgroups. Moderately sensitive differences (11–30pp) represent moderate magnitude, warranting an in-depth qualitative investigation. Highly sensitive differences (>30pp) indicate strong contextual or methodological moderation. The 10pp threshold aligns with conventions in social intervention research, where this magnitude represents the minimum threshold of practical relevance(Lipsey & Wilson, 2001). The 30pp threshold captures differences between the upper and lower quartiles in meta-analyses of moderators (Borenstein et al., 2009).**

**We employed effect direction vote counting, classifying each tested association as positive, negative, or null, and calculating the percentage of Positive Effects per subgroup using the formula % Positive Effects = (N positive associations / N total tested) × 100 (Cumpston et al., 2023; McKenzie & Brennan, 2019). Subgroup comparisons used absolute differences in percentage points (pp).**

**Effect direction vote counting is methodologically superior to statistical significance vote counting (Cumpston et al., 2023) because it is not influenced by variations in statistical power or sample size across studies (Campbell et al., 2020). This method is appropriate when meta-analysis is not feasible because of substantial methodological heterogeneity.**

## Methodological Quality of Included Studies

First, study-level methodological quality was assessed using the Mixed Methods Appraisal Tool (MMAT), producing an average score per study and categorizing quality as High (≥0.8), Medium (0.6–0.79), Low (0.4–0.59), or Very Low (<0.4).

Descriptive statistics (Table A8) and quality by design type (Table A9) summarize the distribution of quality scores across quantitative, experimental, qualitative, and mixed-method designs.

Transparency indicators were also examined (Table A10), including preregistration, open data availability, and declaration of competing interests, providing an overview of open science practices in this literature.

**Table A8**
Methodological quality distribution (MMAT)

| **Quality category** | **N** | **%** | **MMAT interpretation** |
| --- | --- | --- | --- |
| High (≥0.8) | 37 | 48.7 | ≥4 of 5 criteria met |
| Medium (0.6–0.79) | 36 | 47.4 | 3 of 5 criteria met |
| Very Low (<0.4) | 3 | 3.9 | ≤2 of 5 criteria met |
| Total | 76 | 100 | Mean score: 0.708 (SD=0.17) |

*Note.* The mean score of 0.708 indicates that the studies met approximately 3.5 of the five quality criteria on average. The distribution revealed the predominance of adequate quality studies (96.1% ≥ 0.6).

**Table A9**
Methodological Quality by Study Design

| **Study design** | **N** | **Mean** | **Median** |
| --- | --- | --- | --- |
| Panel Survey | 3 | 1.000 | 1.0 |
| Experiment | 13 | 0.723 | 0.8 |
| Content Analysis | 23 | 0.713 | 0.6 |
| Content Analysis (computer-assisted) | 29 | 0.690 | 0.8 |
| Survey | 7 | 0.629 | 0.6 |
| Quasi-experiment | 1 | 0.600 | 0.6 |

*Note.* Panel surveys achieved maximum quality (all five MMAT criteria met), followed by experiments. Content analyses (traditional and computer-assisted) and surveys showed moderate-to-high quality results. Variability across designs reflects inherent differences in methodological challenges (e.g., blinding in content analysis vs. randomization in experiments).

**Table A10**
Scientific Transparency Practices

| **Practice** | **N** | **Percent** |
| --- | --- | --- |
| Pre-registration reported | 2 | 2.6 |
| Open data available | 10 | 13.2 |
| Competing interests declared | 28 | 36.8 |

*Note*. Transparency practices remain limited in this field, with particularly low rates of preregistration (2.6%) and open-data sharing (13.2%).

## Sensitivity Analysis by Dimension

**Table A11**
Sensitivity to Methodological Quality

| **Emotion** | **High quality MMAT ≥ 0.6** | **Low quality MMAT <0.6** | **Diff (pp)** | **Interpretation** |
| --- | --- | --- | --- | --- |
| Positive emotion | 83.3% (N=18) | 50% (N=2) | 33.3pp | Highly sensitive |

*Note*.Other emotions (Anger, Negative emotion, Fear, Hope) did not have sufficient N at both quality levels for robust comparison[[1]](#footnote-1).

**Table A12**
Variation by Digital Platform

| **Emotion** | **Facebook** | **X/Twitter** | **Diff (pp)** | **Interpretation** |
| --- | --- | --- | --- | --- |
| Positive emotion | 100% (N=6) | 57.1 (N=7) | 42.9pp | High specialization |
| Negative emotion | 100% (N=13) | 78.6% (N=14) | 21.4pp | Moderate specialization |
| Anger | 80% (N=10) | 100% (N=3) | 20pp | Moderate specialization |
| Fear | - | 100% (N=2) | - | Insufficient data |

*Note*. Facebook consistently showed a higher prevalence of positive effects than X/Twitter (differences of 20-43pp). No platform reversed the effect direction (positive→negative), only modulated the magnitude. This specialization may reflect differences in affordances (e.g., a more prominent "Like" button on Facebook) or user demographics.

**Table A13**
Cultural Variation (WEIRD vs Non-WEIRD) [[2]](#footnote-2)

| **Emotion** | **WEIRD** | | **Non- WEIRD** | | **diff** | **Interpretation** |
| --- | --- | --- | --- | --- | --- | --- |
| **N** | **%Pos** | **N** | **%Pos** |
| Anger | 4 | 100.0 | 2 | 100.0 | 0.0 | Cross-context robust |
| Fear | 1 | 100.0 | 1 | 100.0 | 0.0 | Cross-context robust |
| Negative emotion | 9 | 66.7 | 11 | 81.8 | 15.1 | Moderate cultural variation |
| Positive emotion | 5 | 100.0 | 5 | 80.0 | 20.0 | Moderate cultural variation |

*Note.* Anger maintained a consistently positive direction in both contexts without variation (0pp), suggesting effect universality. No emotion reversed its direction across cultural contexts. The WEIRD/non-WEIRD dichotomy is an analytical simplification that may mask within-group variations (e.g., differences between China and India).

**Table A14**Contextual specialization (elections vs political communication)

| **Emotion** | **Elections** | | **Political communication** | | **Diff (pp)** | **Interpretation** |
| --- | --- | --- | --- | --- | --- | --- |
| ***N*** | **%Pos** | ***N*** | **%Pos** |
| Anger | 3 | 33.3 | 1 | 100.0 | 66.7 | High specialization |
| Hope | 1 | 100.0 | – | – | – | Insufficient data |
| Negative emotion | 8 | 75.0 | 9 | 88.9 | 13.9 | Moderate specialization |
| Positive emotion | 6 | 50.0 | 5 | 100.0 | 50.0 | High specialization |

*Note.* Positive emotion showed strong contextual specialization (50.0pp difference), with universal positive effects (100%) in routine political communication but moderate presence (50%) in electoral contexts. Both emotions maintained a positive direction across all contexts. This specialization may reflect the greater salience of negative emotions during polarized electoral campaigns.

**Table A15**
Specialization by type of online political participation

| **Emotion** | ***N* OPPs** | **Best OPP** | **% Best** | **Worst OPP** | **% Worst** | **Range (pp)** | **Interpretation** |
| --- | --- | --- | --- | --- | --- | --- | --- |
| Positive emotion | 3 | Like | 100 | Repost | 0 | 100 | High specialization |
| Negative emotion | 3 | Comment | 100 | Repost | 90 | 10 | Robust across OPP types |

*Note.* Positive emotions showed extreme specialization across OPP types (100pp range), being universally effective for "Like" behaviors but ineffective for "Repost" behaviors. Negative emotions were robust across OPP types (only 10pp variation), suggesting a broader mobilization capacity.

# PRISMA 2020 abstract checklist

**Table A16**
PRISMA Abstract Checklist

| Topic | No. | Item | Reported? |
| --- | --- | --- | --- |
| **TITLE** |  |  |  |
| **Title** | 1 | Identify the report as a systematic review. | Yes |
| **BACKGROUND** |  |  |  |
| **Objectives** | 2 | Provide an explicit statement of the main objective(s) or question(s) the review addresses. | No |
| **METHODS** |  |  |  |
| **Eligibility criteria** | 3 | Specify the inclusion and exclusion criteria for the review. | Yes |
| **Information sources** | 4 | Specify the information sources (e.g. databases, registers) used to identify studies and the date when each was last searched. | No |
| **Risk of bias** | 5 | Specify the methods used to assess risk of bias in the included studies. | No |
| **Synthesis of results** | 6 | Specify the methods used to present and synthesize results. | Yes |
| **RESULTS** |  |  |  |
| **Included studies** | 7 | Give the total number of included studies and participants and summarise relevant characteristics of studies. | Yes |
| **Synthesis of results** | 8 | Present results for main outcomes, preferably indicating the number of included studies and participants for each. If meta-analysis was done, report the summary estimate and confidence/credible interval. If comparing groups, indicate the direction of the effect (i.e. which group is favoured). | Yes |
| **DISCUSSION** |  |  |  |
| **Limitations of evidence** | 9 | Provide a brief summary of the limitations of the evidence included in the review (e.g. study risk of bias, inconsistency and imprecision). | Yes |
| **Interpretation** | 10 | Provide a general interpretation of the results and important implications. | Yes |
| **OTHER** |  |  |  |
| **Funding** | 11 | Specify the primary source of funding for the review. | No |
| **Registration** | 12 | Provide the register name and registration number. | Yes |

*Note*. From: Page MJ, McKenzie JE, Bossuyt PM, Boutron I, Hoffmann TC, Mulrow CD, et al. The PRISMA 2020 statement: an updated guideline for reporting systematic reviews. 2021, DOI: 10.1136/bmj.n71.

# PRISMA 2020 main checklist

**Table A17**
PRISMA main checklist

| Topic | No. | Item | Location where item is reported |
| --- | --- | --- | --- |
| **TITLE** |  |  |  |
| **Title** | 1 | Identify the report as a systematic review. | Page 1 |
| **ABSTRACT** |  |  |  |
| **Abstract** | 2 | See the PRISMA 2020 for Abstracts checklist | Page 1 |
| **INTRODUCTION** |  |  |  |
| **Rationale** | 3 | Describe the rationale for the review in the context of existing knowledge. | Section 1, paragraphs 6-10 |
| **Objectives** | 4 | Provide an explicit statement of the objective(s) or question(s) the review addresses. | Section 1, paragraph 13 |
| **METHODS** |  |  |  |
| **Eligibility criteria** | 5 | Specify the inclusion and exclusion criteria for the review and how studies were grouped for the syntheses. | Section 2.2, paragraphs 1-2; Online Appendix A1 |
| **Information sources** | 6 | Specify all databases, registers, websites, organisations, reference lists and other sources searched or consulted to identify studies. Specify the date when each source was last searched or consulted. | Section 2.1, paragraph 3-4 |
| **Search strategy** | 7 | Present the full search strategies for all databases, registers and websites, including any filters and limits used. | Section 2.1, paragraph 2; Online Appendix A2-A5 |
| **Selection process** | 8 | Specify the methods used to decide whether a study met the inclusion criteria of the review, including how many reviewers screened each record and each report retrieved, whether they worked independently, and if applicable, details of automation tools used in the process. | Section 2.2, paragraphs 3-5; Section 2.3, paragraphs 6-8 |
| **Data collection process** | 9 | Specify the methods used to collect data from reports, including how many reviewers collected data from each report, whether they worked independently, any processes for obtaining or confirming data from study investigators, and if applicable, details of automation tools used in the process. | Section 2.3, paragraphs 1-8 |
| **Data items** | 10a | List and define all outcomes for which data were sought. Specify whether all results that were compatible with each outcome domain in each study were sought (e.g. for all measures, time points, analyses), and if not, the methods used to decide which results to collect. | Section 2.3, paragraphs 4-5 |
|  | 10b | List and define all other variables for which data were sought (e.g. participant and intervention characteristics, funding sources). Describe any assumptions made about any missing or unclear information. | Section 2.3, paragraph 2; Online Appendix Section 1.3 (codebook) |
| **Study risk of bias assessment** | 11 | Specify the methods used to assess risk of bias in the included studies, including details of the tool(s) used, how many reviewers assessed each study and whether they worked independently, and if applicable, details of automation tools used in the process. | Section 2.4 |
| **Effect measures** | 12 | Specify for each outcome the effect measure(s) (e.g. risk ratio, mean difference) used in the synthesis or presentation of results. | Section 2.5, paragraphs 4-5 (direction of effects) |
| **Synthesis methods** | 13a | Describe the processes used to decide which studies were eligible for each synthesis (e.g. tabulating the study intervention characteristics and comparing against the planned groups for each synthesis (item 5)). | Section 2.5, paragraphs 3-4 |
|  | 13b | Describe any methods required to prepare the data for presentation or synthesis, such as handling of missing summary statistics, or data conversions. | Section 2.5, paragraphs 1-2 |
| 13c | Describe any methods used to tabulate or visually display results of individual studies and syntheses. | Section 2.5, paragraph 8 (harvest plot, Fig. 4) |
| 13d | Describe any methods used to synthesize results and provide a rationale for the choice(s). If meta-analysis was performed, describe the model(s), method(s) to identify the presence and extent of statistical heterogeneity, and software package(s) used. | Section 2.5, paragraphs 2-3 (SWiM guidelines) |
| 13e | Describe any methods used to explore possible causes of heterogeneity among study results (e.g. subgroup analysis, meta-regression). | Section 2.5, paragraphs 5-7 |
| 13f | Describe any sensitivity analyses conducted to assess robustness of the synthesized results. | Section 3.2; Online Appendix A11-A15 |
| **Reporting bias assessment** | 14 | Describe any methods used to assess risk of bias due to missing results in a synthesis (arising from reporting biases). | Not applied; narrative synthesis without meta-analysis; addressed in Section 4.1 (Limitations) |
| **Certainty assessment** | 15 | Describe any methods used to assess certainty (or confidence) in the body of evidence for an outcome. | Not applied; addressed in Section 4.1 (Limitations) |
| **RESULTS** |  |  |  |
| **Study selection** | 16a | Describe the results of the search and selection process, from the number of records identified in the search to the number of studies included in the review, ideally using a flow diagram. | Section 2.2, Fig. 1 (PRISMA flow diagram) |
|  | 16b | Cite studies that might appear to meet the inclusion criteria, but which were excluded, and explain why they were excluded. | Section 2.2, paragraphs 4-5; Fig. 1; OSF repository |
| **Study characteristics** | 17 | Cite each included study and present its characteristics. | Section 3, paragraphs 2-8; Figs. 2-3; OSF repository |
| **Risk of bias in studies** | 18 | Present assessments of risk of bias for each included study. | Section 3.2.1; Online Appendix A8-A9 |
| **Results of individual studies** | 19 | For all outcomes, present, for each study: (a) summary statistics for each group (where appropriate) and (b) an effect estimate and its precision (e.g. confidence/credible interval), ideally using structured tables or plots. | Section 3.1 (by emotion group); Fig. 4 (harvest plot); OSF repository |
| **Results of syntheses** | 20a | For each synthesis, briefly summarise the characteristics and risk of bias among contributing studies. | Section 3.1, each emotion subsection |
|  | 20b | Present results of all statistical syntheses conducted. If meta-analysis was done, present for each the summary estimate and its precision (e.g. confidence/credible interval) and measures of statistical heterogeneity. If comparing groups, describe the direction of the effect. | Section 3.1; Fig. 4 (harvest plot) |
| 20c | Present results of all investigations of possible causes of heterogeneity among study results. | Section 3.2.4-3.2.5; Online Appendix A13-A15 |
| 20d | Present results of all sensitivity analyses conducted to assess the robustness of the synthesized results. | Section 3.2.6; Online Appendix A11-A15 |
| **Reporting biases** | 21 | Present assessments of risk of bias due to missing results (arising from reporting biases) for each synthesis assessed. | Section 4.1 |
| **Certainty of evidence** | 22 | Present assessments of certainty (or confidence) in the body of evidence for each outcome assessed. | Not applied |
| **DISCUSSION** |  |  |  |
| **Discussion** | 23a | Provide a general interpretation of the results in the context of other evidence. | Section 4, paragraphs 1-7 |
|  | 23b | Discuss any limitations of the evidence included in the review. | Section 4.1, paragraphs 2-4 |
| 23c | Discuss any limitations of the review processes used. | Section 4.1, paragraphs 1, 4-6 |
| 23d | Discuss implications of the results for practice, policy, and future research. | Section 4.2 |
| **OTHER INFORMATION** |  |  |  |
| **Registration and protocol** | 24a | Provide registration information for the review, including register name and registration number, or state that the review was not registered. | Section 2.1, paragraph 1 |
|  | 24b | Indicate where the review protocol can be accessed, or state that a protocol was not prepared. | Section 2.1, paragraph 1 (OSF repository) |
| 24c | Describe and explain any amendments to information provided at registration or in the protocol. | Not applicable |
| **Support** | 25 | Describe sources of financial or non-financial support for the review, and the role of the funders or sponsors in the review. | Statements and Declarations |
| **Competing interests** | 26 | Declare any competing interests of review authors. | Statements and Declarations |
| **Availability of data, code and other materials** | 27 | Report which of the following are publicly available and where they can be found: template data collection forms; data extracted from included studies; data used for all analyses; analytic code; any other materials used in the review. | Section 2.1, paragraph 1 |

*Note.* From: Page MJ, McKenzie JE, Bossuyt PM, Boutron I, Hoffmann TC, Mulrow CD, et al. The PRISMA 2020 statement: an updated guideline for reporting systematic reviews. 2021, DOI: 10.1136/bmj.n71.

# Synthesis Without Meta-analysis (SWiM) reporting items

**Table A18**
Synthesis Without Meta-Analysis (SWiM) Reporting Items

| **SWiM reporting item** | **Item description** | **Location where item is reported** |
| --- | --- | --- |
| **METHODS** | | |
| **1 Grouping studies for synthesis** | 1a) Provide a description of, and rationale for, the groups used in the synthesis (e.g., groupings of populations, interventions, outcomes, study design) | Section 2.3, paragraphs 4-5 (four thematic axes: emotion types, OPP modalities, national contexts, digital platforms); Section 2.5, paragraphs 3-4 |
| 1b) Detail and provide rationale for any changes made subsequent to the protocol in the groups used in the synthesis | Not applicable |
| **2 Describe the standardised metric and transformation methods used** | Describe the standardised metric for each outcome. Explain why the metric(s) was chosen and describe any methods used to transform the intervention effects, as reported, to the standardised metric, citing any methodological guidance consulted | Section 2.5, paragraphs 4-5 (direction of effects: positive, negative, neutral); Section 3.1, paragraphs 1-4 (classification criteria) |
| **3 Describe the synthesis methods** | Describe and justify the methods used to synthesise the effects for each outcome when it was not possible to undertake a meta-analysis of effect estimates | Section 2.5, paragraphs 1-3 (narrative synthesis following SWiM guidelines; vote counting by direction of effect) |
| **4 Criteria used to prioritise results for summary and synthesis** | Where applicable, provide the criteria used, with supporting justification, to select the particular studies, or a particular study, for the main synthesis or to draw conclusions from the synthesis (e.g., based on study design, risk of bias assessments, directness in relation to the review question) | Section 2.5, paragraphs 5-7 (methodological factors: study quality, design, measurement method; contextual factors: political regime, platform, participation type) |
| **5 Investigation of heterogeneity in reported effects** | State the method(s) used to examine heterogeneity in reported effects when it was not possible to undertake a meta-analysis of effect estimates and its extensions to investigate heterogeneity | Section 2.5, paragraphs 5-7 (patterns, consistencies, divergences); Section 3.2.4-3.2.6; Online Appendix A11-A15 |
| **6 Certainty of evidence** | Describe the methods used to assess the certainty of the synthesis findings | Not applied |
| **7 Data presentation methods** | Describe the graphical and tabular methods used to present the effects (e.g., tables, forest plots, harvest plots) | Section 2.5, paragraph 8 (harvest plot); Section 3, Figs. 2-4 |
| Specify key study characteristics (e.g., study design, risk of bias) used to order the studies, in the text and any tables or graphs, clearly referencing the studies included | Section 3.1 (organized by emotion group, with study citations); Section 3.2.1 (MMAT quality); Figs. 2-3 (study characteristics); OSF repository |
| **RESULTS** | | |
| **8 Reporting results** | For each comparison and outcome, provide a description of the synthesised findings and the certainty of the findings. Describe the result in language that is consistent with the question the synthesis addresses, and indicate which studies contribute to the synthesis | Section 3.1, all emotion subsections (Negative emotions, General Emotionality, Anger, Positive emotion, Enthusiasm, Sadness, Fear, Hope, Anxiety, Happiness/Pride/Nostalgia/Resentment); Fig. 4 (harvest plot) |
| **DISCUSSION** | | |
| **9 Limitations of the synthesis** | Report the limitations of the synthesis methods used and/or the groupings used in the synthesis and how these affect the conclusions that can be drawn in relation to the original review question | Section 4.1, paragraphs 4-5 (heterogeneity, vote counting limitations, no effect magnitude) |

*Note.* SWiM is intended to complement and be used as an extension to PRISMA. Adapted from "The Synthesis Without Meta-analysis (SWiM) in systematic reviews: reporting guideline" by M. McKenzie and S. E. Brennan, 2019, *BMJ*, 367, l6890. https://doi.org/10.1136/bmj.l6890

# References

Borenstein, M., Hedges, L. V., Higgins, J. P. T., & Rothstein, H. R. (2009). *Introduction to Meta‐Analysis* (1st edn). Wiley. https://doi.org/10.1002/9780470743386

Campbell, M., McKenzie, J. E., Sowden, A., Katikireddi, S. V., Brennan, S. E., Ellis, S., Hartmann-Boyce, J., Ryan, R., Shepperd, S., Thomas, J., Welch, V., & Thomson, H. (2020). Synthesis without meta-analysis (SWiM) in systematic reviews: Reporting guideline. *BMJ*, *368*, l6890. https://doi.org/10.1136/bmj.l6890

Cohen, J. (1960). A Coefficient of Agreement for Nominal Scales. *Educational and Psychological Measurement*, *20*(1), 37–46. https://doi.org/10.1177/001316446002000104

Cumpston, M. S., Brennan, S. E., Ryan, R., & McKenzie, J. E. (2023). Synthesis methods other than meta-analysis were commonly used but seldom specified: Survey of systematic reviews. *Journal of Clinical Epidemiology*, *156*, 42–52. https://doi.org/10.1016/j.jclinepi.2023.02.003

Henrich, J., Heine, S. J., & Norenzayan, A. (2010). The weirdest people in the world? *Behavioral and Brain Sciences*, *33*(2–3), 61–83. https://doi.org/10.1017/S0140525X0999152X

Hong, Q. N., Fàbregues, S., Bartlett, G., Boardman, F., Cargo, M., Dagenais, P., Gagnon, M.-P., Griffiths, F., Nicolau, B., O’Cathain, A., Rousseau, M.-C., Vedel, I., & Pluye, P. (2018). The Mixed Methods Appraisal Tool (MMAT) version 2018 for information professionals and researchers. *Education for Information*, *34*(4), 285–291. https://doi.org/10.3233/EFI-180221

Landis, J. R., & Koch, G. G. (1977). The measurement of observer agreement for categorical data. *Biometrics*, *33*(1), 159–174.

Lipsey, M. W., & Wilson, D. B. (2001). *Practical meta-analysis* (pp. ix, 247). Sage Publications, Inc.

McKenzie, J. E., & Brennan, S. E. (2019). *Synthesizing and presenting findings using other methods*. 321–347. https://doi.org/10.1002/9781119536604.ch12

Noyes, J., Booth, A., Cargo, M., Flemming, K., Harden, A., Harris, J., Garside, R., Hannes, K., Pantoja, T., & Thomas, J. (2019). Qualitative evidence. In *Cochrane Handbook for Systematic Reviews of Interventions* (pp. 525–545). John Wiley & Sons, Ltd. https://doi.org/10.1002/9781119536604.ch21

Page, M. J., McKenzie, J. E., Bossuyt, P. M., Boutron, I., Hoffmann, T. C., Mulrow, C. D., Shamseer, L., Tetzlaff, J. M., Akl, E. A., Brennan, S. E., Chou, R., Glanville, J., Grimshaw, J. M., Hróbjartsson, A., Lalu, M. M., Li, T., Loder, E. W., Mayo-Wilson, E., McDonald, S., … Moher, D. (2021). The PRISMA 2020 statement: An updated guideline for reporting systematic reviews. *BMJ*, *372*, n71. https://doi.org/10.1136/bmj.n71

Pluye, P., Gagnon, M.-P., Griffiths, F., & Johnson-Lafleur, J. (2009). A scoring system for appraising mixed methods research, and concomitantly appraising qualitative, quantitative and mixed methods primary studies in Mixed Studies Reviews. *International Journal of Nursing Studies*, *46*(4), 529–546. https://doi.org/10.1016/j.ijnurstu.2009.01.009

Popay, J., Roberts, H., Sowden, A., Petticrew, M., Arai, L., Rodgers, M., Britten, N., Roen, K., & Duffy, S. (2006). *Guidance on the conduct of narrative synthesis in systematic reviews: A product from the ESRC Methods Programme*. Lancaster University. https://doi.org/10.13140/2.1.1018.4643

Rodgers, M., Sowden, A., Petticrew, M., Arai, L., Roberts, H., Britten, N., & Popay, J. (2009). Testing Methodological Guidance on the Conduct of Narrative Synthesis in Systematic Reviews: Effectiveness of Interventions to Promote Smoke Alarm Ownership and Function. *Evaluation*, *15*(1), 49–73. https://doi.org/10.1177/1356389008097871

1. Only positive emotion could be adequately tested. The 33.3pp difference exceeds the high sensitivity threshold (>30pp), suggesting that low methodological quality studies underestimated genuine positive emotion effects by 33 percentage points. Findings on positive emotions should be interpreted cautiously when derived from studies with MMAT <0.6. [↑](#footnote-ref-1)
2. WEIRD (Henrich et al., 2010): Western, Educated, Industrialized, Rich, Democratic countries (USA, Germany, UK, Canada, Australia, Austria, Switzerland, Italy, Belgium, Spain, Netherlands); Non-WEIRD: China, Taiwan, South Korea, India, Russia, Turkey, Brazil, Argentina, Ecuador. [↑](#footnote-ref-2)
